# Supplementary material for: Metagenomic and metatranscriptomic insights into sulfate-reducing bacteria in a revegetated acidic mine wasteland
Source: PubMed Central journal article supplement (PMC9448743; doi:10.1038/s41522-022-00333-9), 2022-09-06
Supplement: 41522_2022_333_MOESM1_ESM.pdf [file 41522_2022_333_MOESM1_ESM.pdf]

1 *Supplementary information for*

2  
3 **Metagenomic and metatranscriptomic insights into sulfate-reducing bacteria in**  
4 **a revegetated acidic mine wasteland**

5  
6 Jin-tian Li<sup>1,2,†</sup>, Pu Jia<sup>1,†</sup>, Xiao-juan Wang<sup>1</sup>, Shu-ning Ou<sup>1</sup>, Tao-tao Yang<sup>2</sup>, Shi-wei  
7 Feng<sup>1</sup>, Jing-li Lu<sup>1</sup>, Zhou Fang<sup>1</sup>, Jun Liu<sup>2</sup>, Bin Liao<sup>2</sup>, Wen-sheng Shu<sup>1</sup>, & Jie-Liang  
8 Liang<sup>1,\*</sup>

9  
10 <sup>1</sup>Institute of Ecological Science, Guangzhou Key Laboratory of Subtropical  
11 Biodiversity and Biomonitoring, Guangdong Provincial Key Laboratory of  
12 Biotechnology for Plant Development, School of Life Sciences, South China Normal  
13 University, Guangzhou 510631, PR China

14 <sup>2</sup>School of Life Sciences, Sun Yat-sen University, Guangzhou 510275, PR China

15  
16  
17 <sup>†</sup>These authors contributed equally to this work.

18  
19  
20 \*Corresponding author:

21 School of Life Sciences, South China Normal University, Guangzhou 510631, PR  
22 China

23 E-mail: Jie-Liang Liang ([liangjl@m.scnu.edu.cn](mailto:liangjl@m.scnu.edu.cn))

24 Tel.: +86 20 85211850; Fax: +86 20 85211850

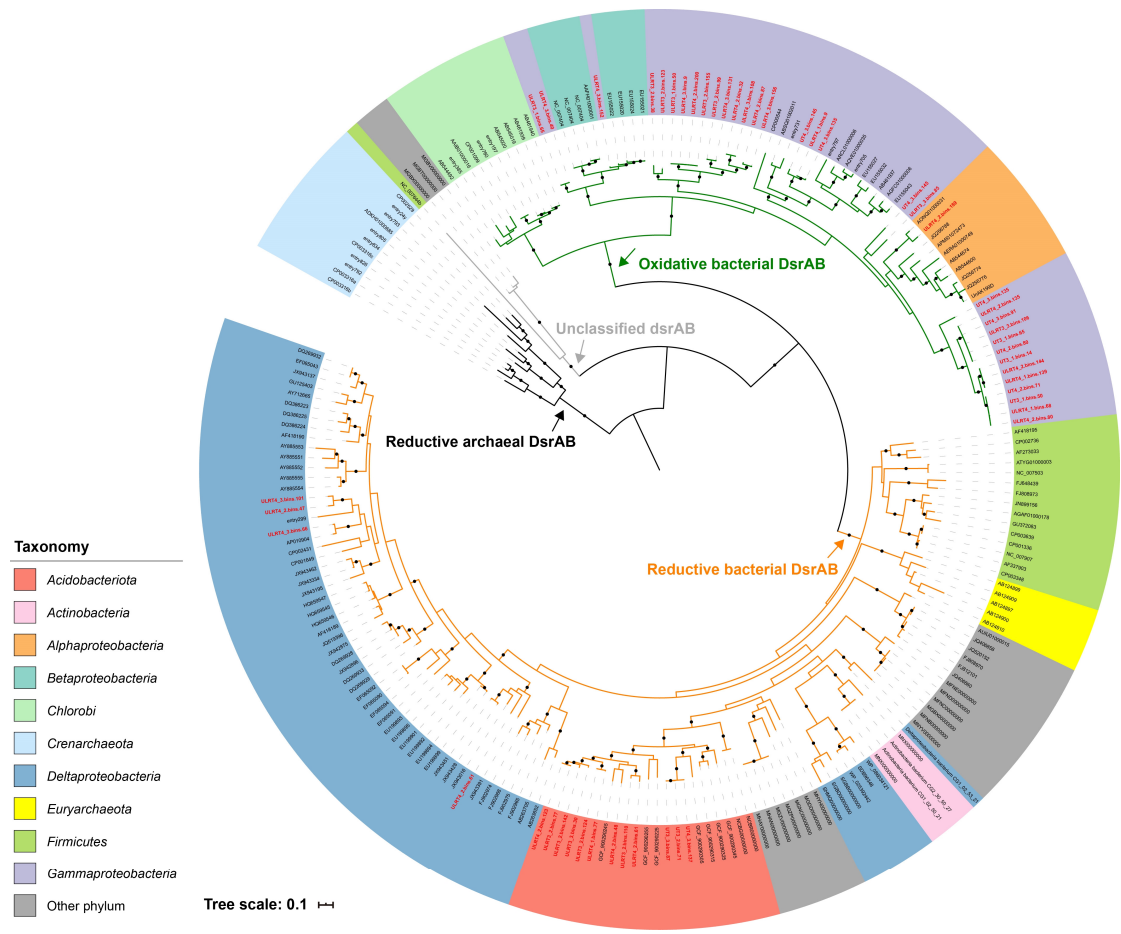

25

26

27 **Supplementary figure 1.** Phylogenic analysis of dissimilatory sulfite reductases  
 28 DsrAB. Concatenated DsrAB protein sequences identified in this study are marked in  
 29 bold red. Assignment of oxidative/reductive, bacterial/archaeal type DsrAB was  
 30 according to previous studies<sup>1,2</sup>. Bootstrap values were based on 100 replicates, and  
 31 only bootstrap values higher than 70% are shown with black circles. Tree scale bar =  
 32 0.1.

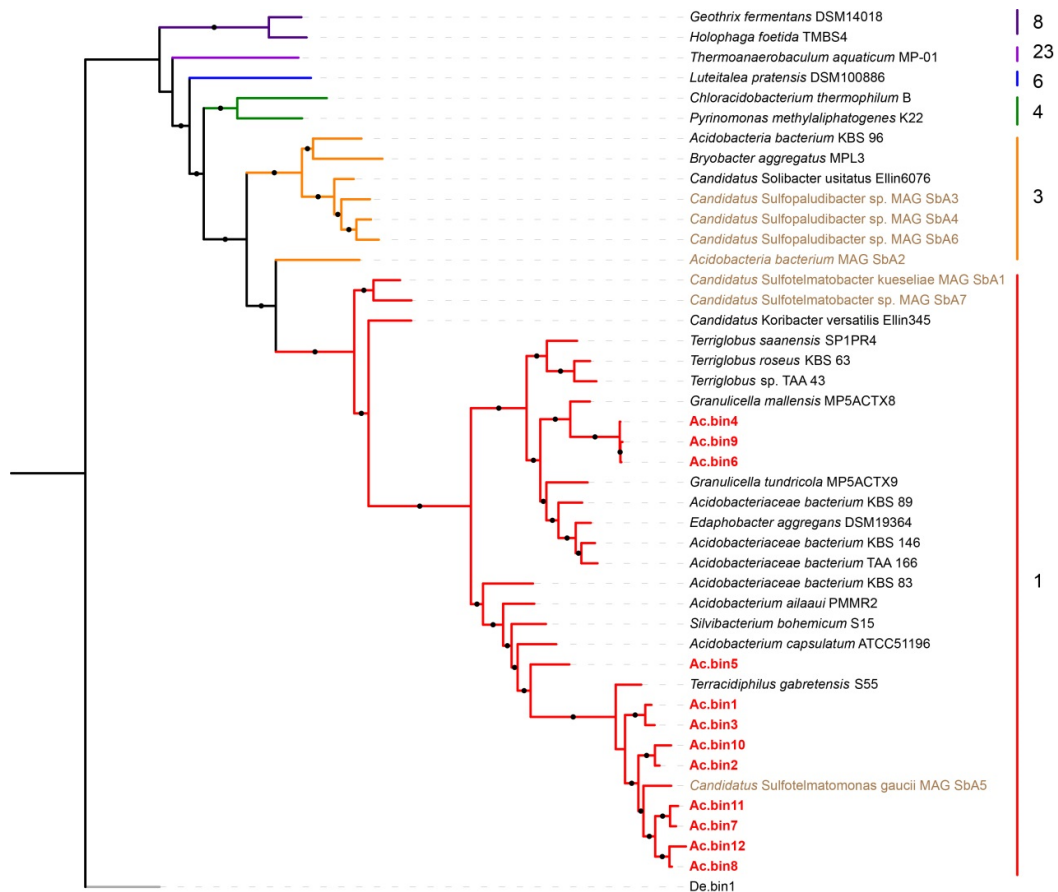

33

Tree scale: 1

34

35 **Supplementary figure 2.** Phylogenetic analysis of the genomes from *Acidobacteria*

36 phylum. The maximum-likelihood phylogenetic tree was constructed based on a

37 concatenated dataset of 400 universally conserved marker proteins using

38 PhyloPhlAn. Subdivisions are indicated to the right of the tree. The 12

39 metagenome-assembled genomes (MAGs) harboring sequences of *dsrAB* genes

40 reported in this study are marked in bold red. The 7 MAGs previously reported to

41 have a dissimilatory sulfur metabolism potential are marked in brown. Bootstrap

42 values were based on 100 replicates, and percentages higher than 70% are shown

43 with black circles. The MAG (De.bin1) from *Deltaproteobacteria* was used as an

44 outgroup. Tree scale bar = 1.

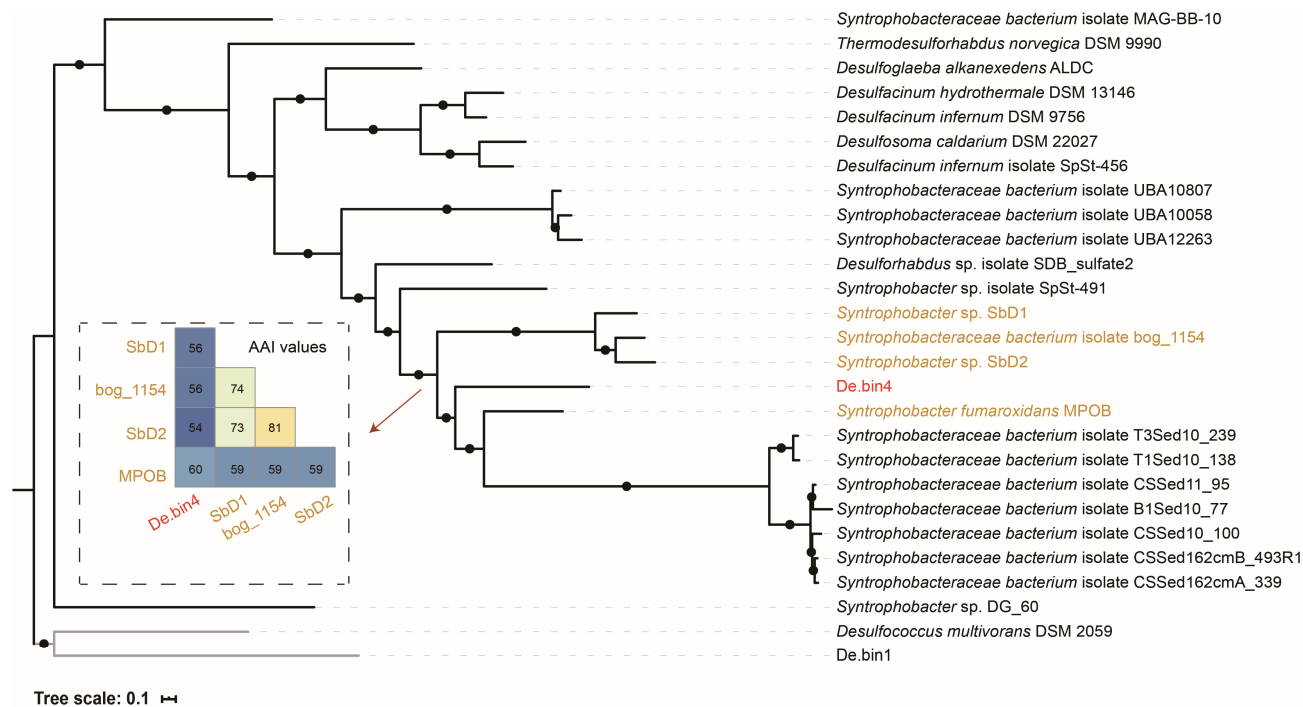

45

46 **Supplementary figure 3.** Phylogenetic analysis of the genomes from *Syntrophobacteraceae* family. The maximum-likelihood phylogenetic tree  
47 was constructed using PhyloPhlAn. The *dsrAB*-containing MAG reported in this study (i.e. De.bin4) is marked in bold red. The four reference  
48 genomes of the two closest genera to the MAG are marked in brown. The average amino acid identity (AAI) values between the 5 closest  
49 genomes are shown in the inset. Bootstrap values were based on 100 replicates, and percentages higher than 70% are shown with black circles.  
50 Two genomes (De.bin1 and *Desulfococcus multivorans* DSM 2059) from *Deltaproteobacteria* were used as the outgroup. Tree scale bar = 0.1.



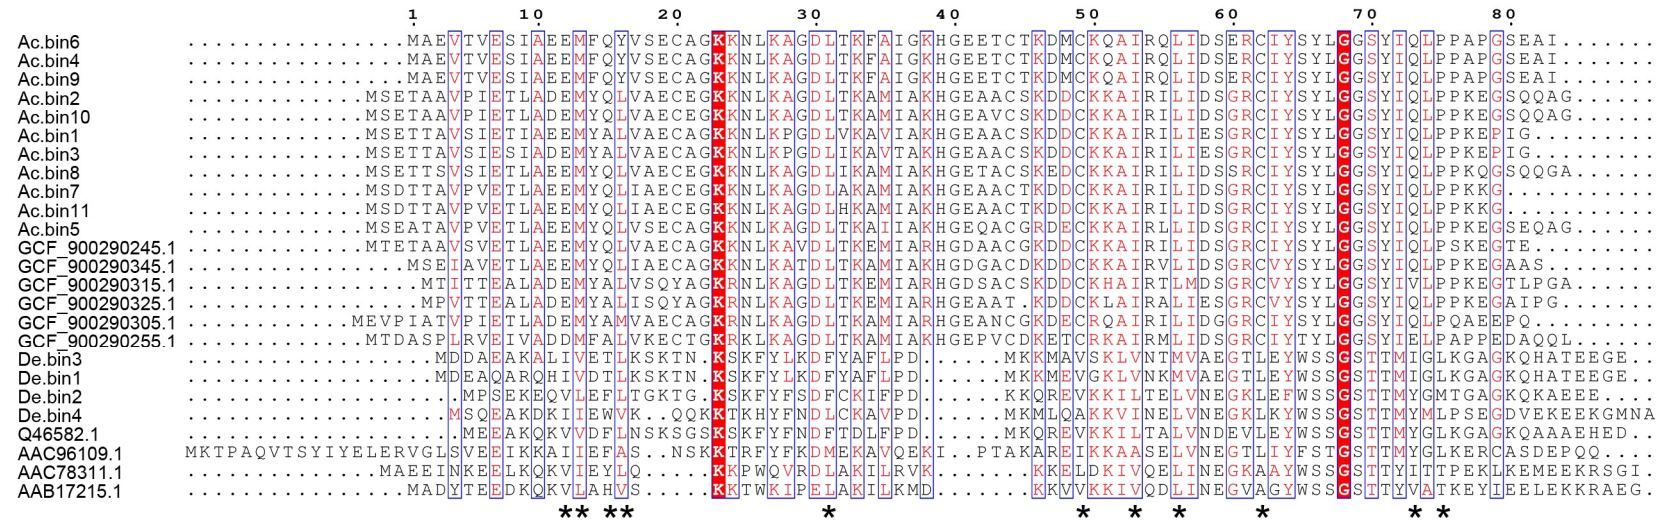

51

52 **Supplementary figure 4.** Sequence alignment of DsrD proteins identified in this study with reference sequences. Positions of conserved,  
 53 hydrophobic residues in the DsrD family are marked with asterisks<sup>3</sup>. Highly conserved residues of the same type are highlighted in red  
 54 background.

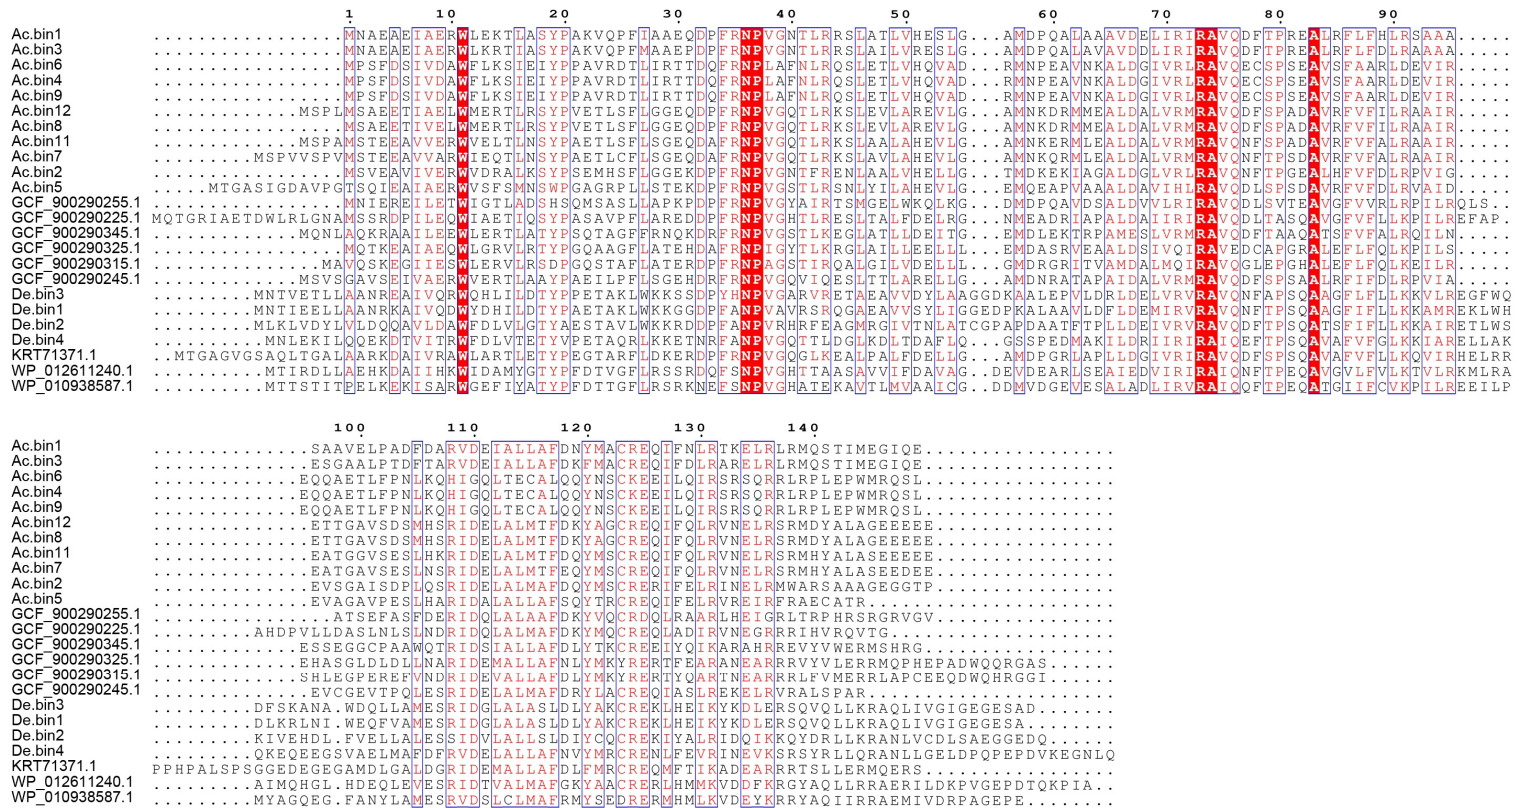

55

56 **Supplementary figure 5.** Sequence alignment of DsrT proteins identified in this study with reference sequences. Highly conserved residues of

57 the same type are highlighted in red background.

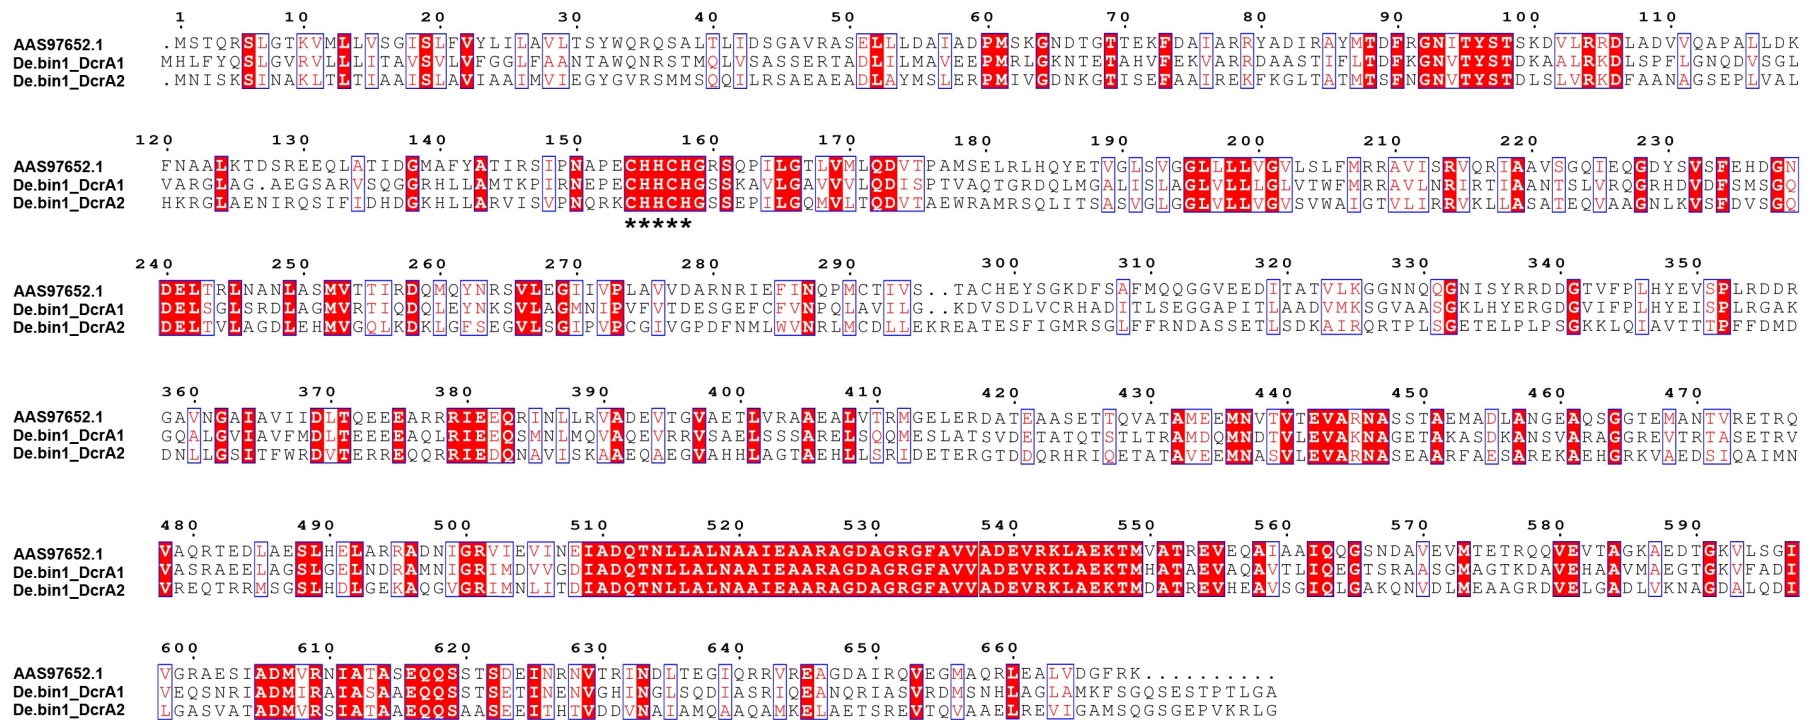

58

59 **Supplementary figure 6.** Sequence alignment of DcrA proteins identified in this study with reference sequence identified in *Desulfovibrio*  
 60 *vulgaris* str. Hildenborough. Specific sequences, CHHCH, corresponding to a consensus c-type heme-binding site are marked with asterisks<sup>4</sup>.  
 61 Highly conserved residues of the same type are highlighted in red background.

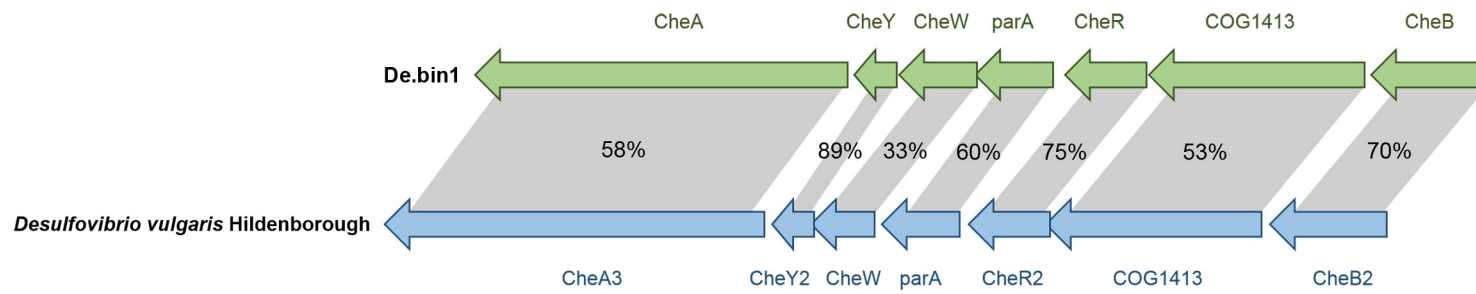

62

63 **Supplementary figure 7.** Operons encoding the *cheA* chemotaxis gene in *De.bin1* and *D. vulgaris*<sup>5</sup>. Arrows represented the coding regions. The

64 percentages in grey shadings indicate sequence similarities.

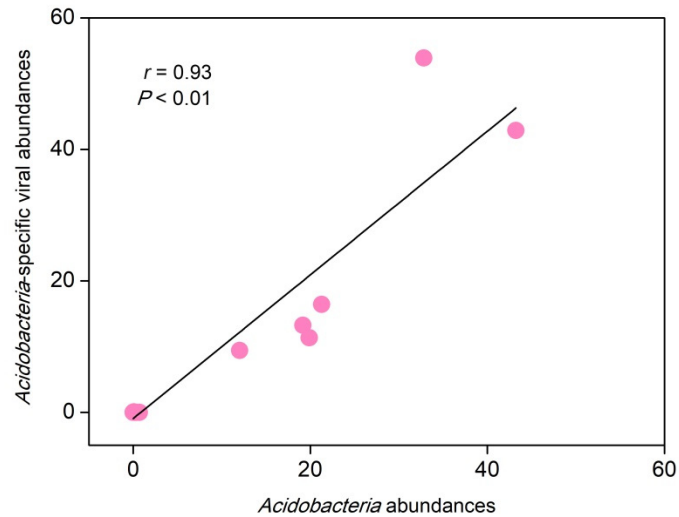

65

66 **Supplementary figure 8.** Virus/host abundance ratio for *Acidobacteria* with a  
67 dissimilatory sulfur metabolism. *Acidobacteria* abundance and the abundance of their  
68 viruses (both calculated as the mean coverage depth from reads mapping, normalized  
69 by the number of reads in each metagenomic dataset) are plotted for each sample.  
70 Pearson correlation analysis was used to correlate the host and viral abundance.



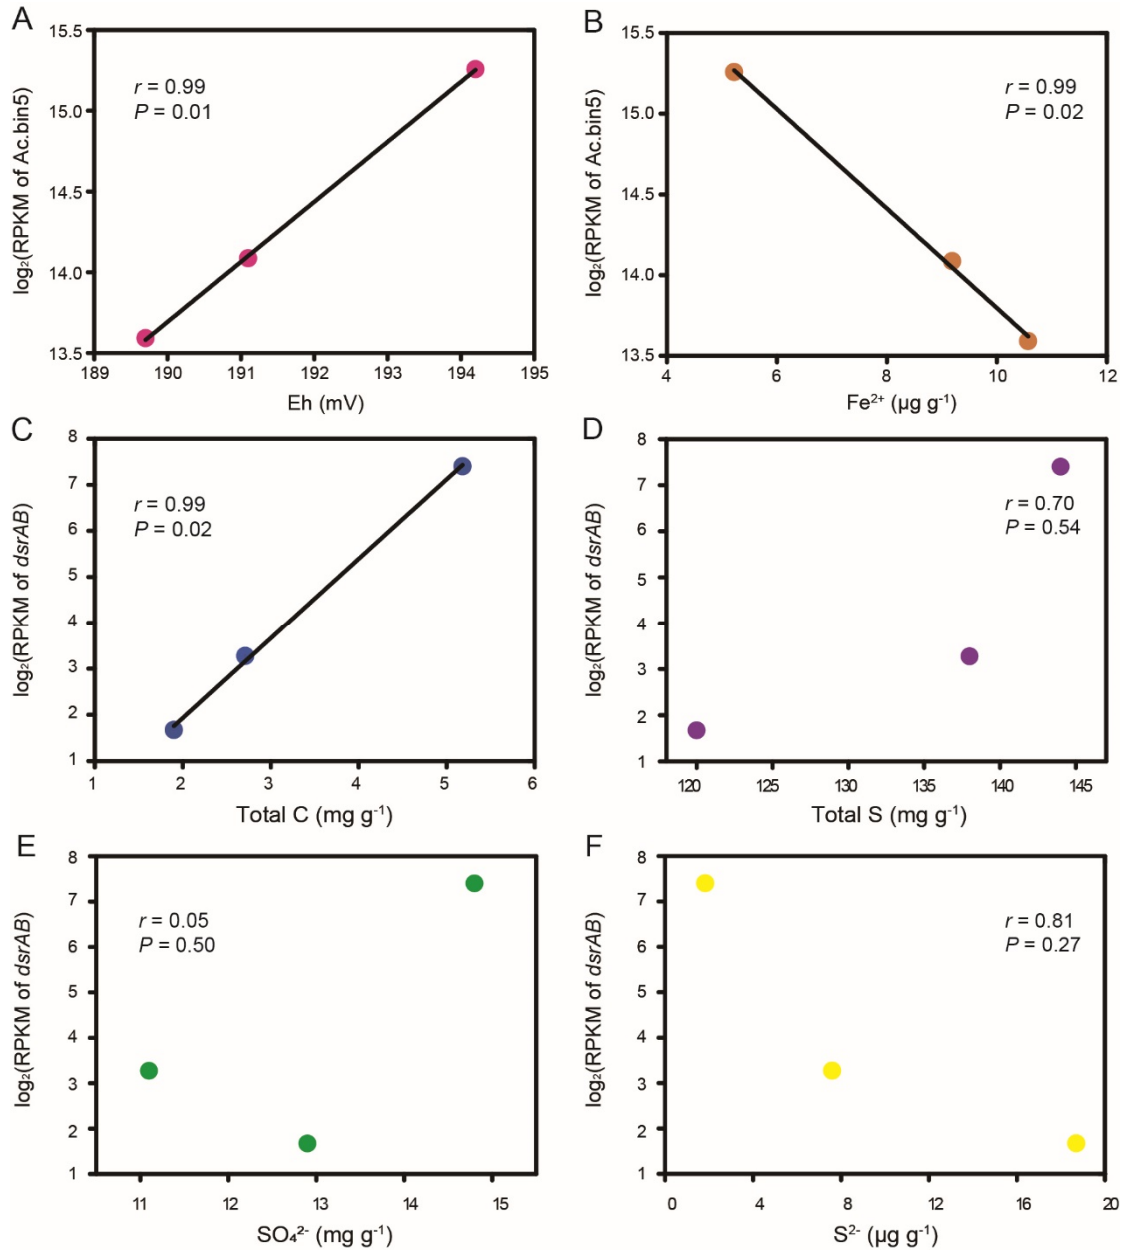

71

72 **Supplementary figure 9.** Correlations between transcript abundance of Ac.bin5 and  
 73 soil Eh (a) and ferrous iron concentrations (b), and correlations between transcript  
 74 abundance of *dsrAB* and concentrations of soil total carbon (c), total sulfur (d), sulfate  
 75 (e) and sulfide (f). Results are based on Pearson correlation analysis.

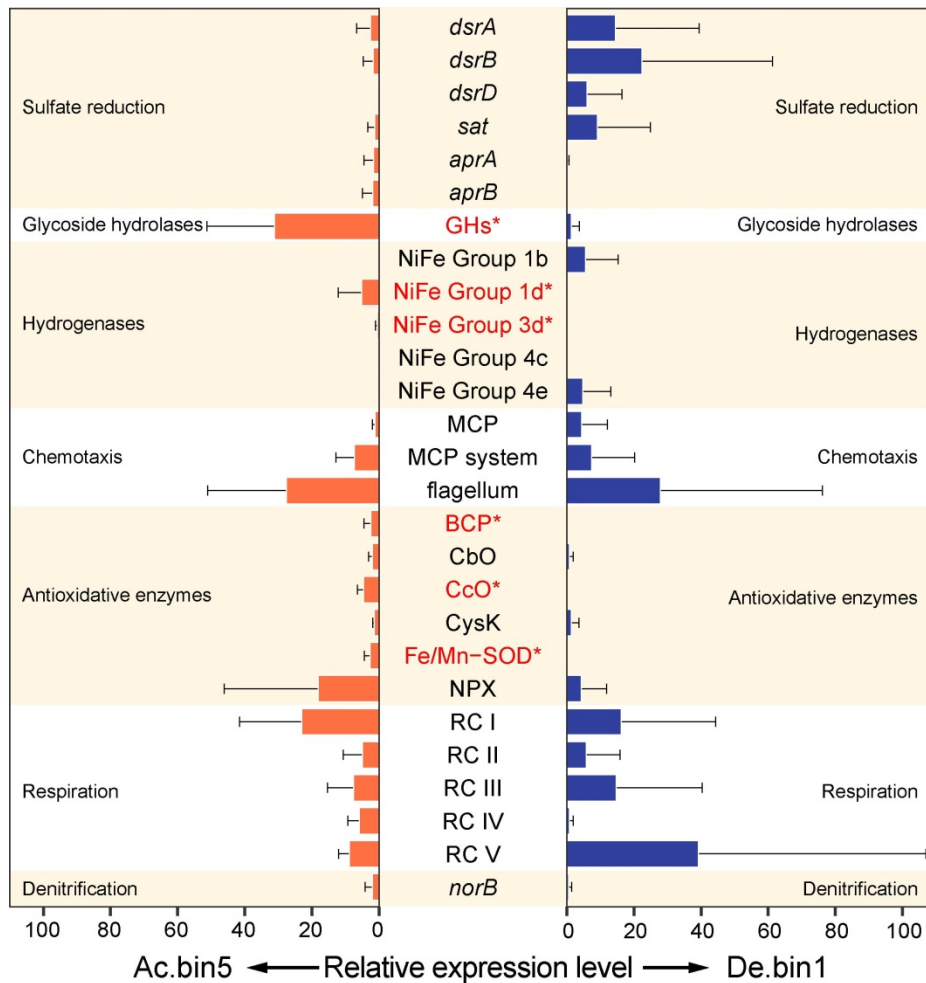

76

77

78 **Supplementary figure 10.** Comparison of Ac.bin5 and De.bin1 on relative expression  
79 levels of genes involving in selected metabolic potentials. Relative expression level  
80 was calculated based on the reads per kilobase per million mapped reads (RPKM) of a  
81 given selected gene normalized by that of the reference gene *gyrA*. The relative gene  
82 expression levels of hydrogenases were selected to indicate the activity of  
83 fermentation processes occurred in the two SRMs. Values are presented as  
84 means  $\pm$  SD ( $n=3$ ). Kruskal-Wallis rank sum test was performed to determine  
85 significant differences in the relative gene expression levels between the two strains. \*  
86  $P < 0.05$ . The gene abbreviations are in accordance with those in Fig. 2. RC,  
87 respiratory complex. The results are based on three soil samples collected from the

88 unamended layer of the revegetated tailings. Additional details are presented in  
89 Supplementary Table 2–8 and 13.



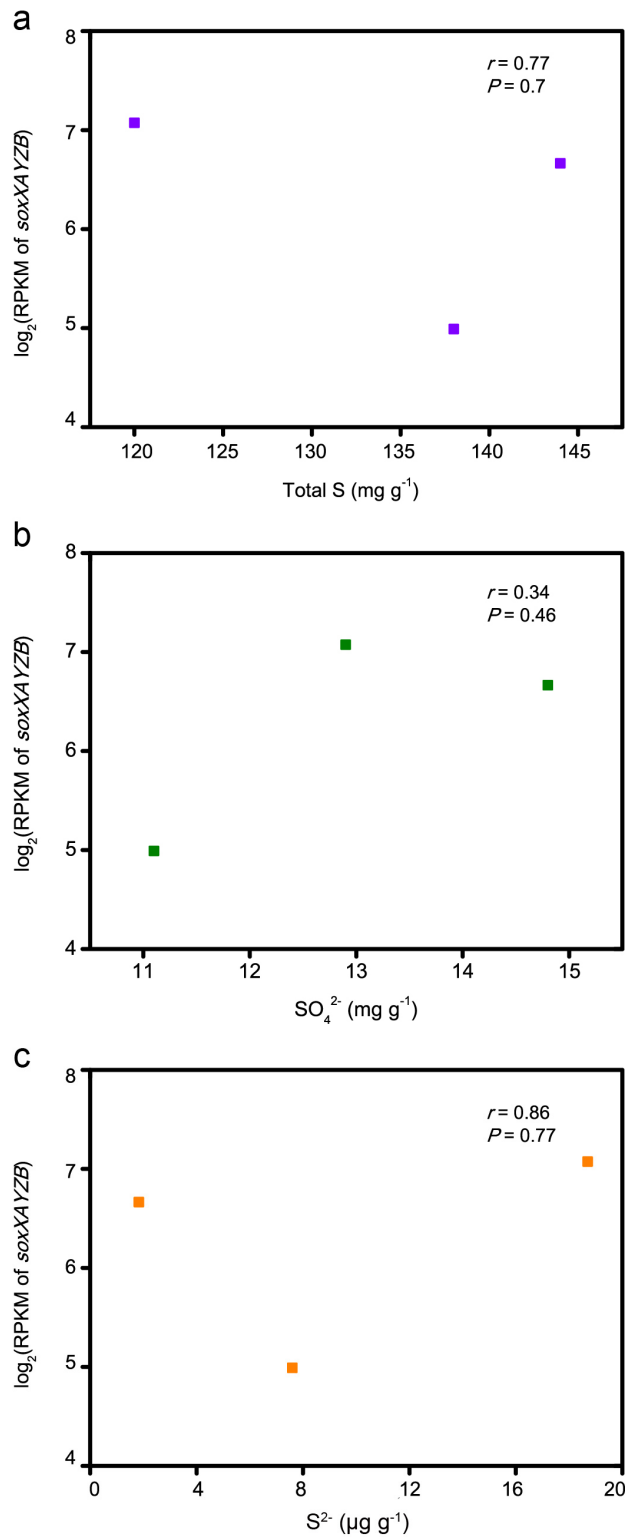

90

91 **Supplementary figure 11.** Correlations between transcript abundance of soxXAYZB

92 and concentrations of soil total sulfur (a), sulfate (b) and sulfide (c). Results are based

93 on Pearson correlation analysis.

**Supplementary Table 1. Overview of the reductive *dsrAB*-containing MAGs recovered from the mine wasteland.**

| MAG IDs  | Genome bins <sup>#</sup> | Completeness (%) | Contamination (%) | Genome size (Mb) | Gene no. | Taxonomy (based on GTDB-Tk annotation)                                                      | 16S rRNA sequence predicted | Relative abundance (%) |
|----------|--------------------------|------------------|-------------------|------------------|----------|---------------------------------------------------------------------------------------------|-----------------------------|------------------------|
| Ac.bin1  | ULRT4_3.bins.75          | 98.06            | 0.86              | 4.75             | 3947     | Acidobacteriota;Acidobacteriae;Acidobacteriales;Acidobacteriaceae;Terracidiphilus;          | Yes                         | 0.055                  |
| Ac.bin2  | ULRT4_1.bins.77          | 95.53            | 1.72              | 5.11             | 4196     | Acidobacteriota;Acidobacteriae;Acidobacteriales;Acidobacteriaceae;Terracidiphilus;          | Yes                         | 0.054                  |
| Ac.bin3  | ULRT3_2.bins.110         | 95.47            | 7.76              | 6.53             | 5817     | Acidobacteriota;Acidobacteriae;Acidobacteriales;Acidobacteriaceae;Terracidiphilus;          | Yes                         | 0.030                  |
| De.bin1  | ULRT4_3.bins.101         | 94.64            | 0.79              | 3.68             | 3325     | Desulfobacterota_A;Desulfovibrionia;Desulfovibrionales;Desulfovibrionaceae;Desulfovibrio_N; | No                          | 0.051                  |
| Ac.bin4  | UT3_2.bins.71            | 94.02            | 0                 | 4.23             | 3399     | Acidobacteriota;Acidobacteriae;Acidobacteriales;Acidobacteriaceae;Granulicella_A;           | No                          | 0.031                  |
| Ac.bin5  | ULRT4_2.bins.48          | 92.67            | 0                 | 5.82             | 5139     | Acidobacteriota;Acidobacteriae;Acidobacteriales;Acidobacteriaceae;Palsa-343;                | Yes                         | 0.036                  |
| Ac.bin6  | UT4_3.bins.137           | 92.65            | 0.43              | 3.73             | 3093     | Acidobacteriota;Acidobacteriae;Acidobacteriales;Acidobacteriaceae;Granulicella_A;           | No                          | 0.031                  |
| Ac.bin7  | ULRT3_3.bins.30          | 89.78            | 0.43              | 4.28             | 3682     | Acidobacteriota;Acidobacteriae;Acidobacteriales;Acidobacteriaceae;Terracidiphilus;          | Yes                         | 0.028                  |
| Ac.bin8  | ULRT3_2.bins.77          | 88.69            | 7.76              | 4.51             | 4019     | Acidobacteriota;Acidobacteriae;Acidobacteriales;Acidobacteriaceae;Terracidiphilus;          | No                          | 0.046                  |
| Ac.bin9  | UT3_3.bins.87            | 78.4             | 0                 | 3.15             | 2801     | Acidobacteriota;Acidobacteriae;Acidobacteriales;Acidobacteriaceae;Granulicella_A;           | No                          | 0.031                  |
| De.bin2  | ULRT4_3.bins.66          | 75.17            | 0.86              | 3.02             | 2975     | Desulfobacterota_A;Desulfovibrionia;Desulfovibrionales;Desulfovibrionaceae;Desulfovibrio_F; | Yes                         | 0.024                  |
| Ac.bin10 | ULRT3_2.bins.124         | 66.11            | 0                 | 3.61             | 3559     | Acidobacteriota;Acidobacteriae;Acidobacteriales;Acidobacteriaceae;Terracidiphilus;          | Yes                         | 0.020                  |
| De.bin3  | ULRT4_2.bins.47          | 65.41            | 0                 | 2.45             | 2585     | Desulfobacterota_A;Desulfovibrionia;Desulfovibrionales;Desulfovibrionaceae;Desulfovibrio_N; | No                          | 0.036                  |
| De.bin4  | ULRT4_2.bins.61          | 63.39            | 0.81              | 2.50             | 2589     | Desulfobacterota;Syntrophobacteria;Syntrophobacteriales;Syntrophobacteraceae;;              | No                          | 0.018                  |
| Ac.bin11 | ULRT3_2.bins.142         | 59.77            | 0                 | 3.15             | 2649     | Acidobacteriota;Acidobacteriae;Acidobacteriales;Acidobacteriaceae;Terracidiphilus;          | Yes                         | 0.039                  |
| Ac.bin12 | ULRT4_2.bins.123         | 53.76            | 0                 | 2.58             | 2618     | Acidobacteriota;Acidobacteriae;Acidobacteriales;Acidobacteriaceae;Terracidiphilus;          | No                          | 0.046                  |

<sup>#</sup>The bins were named after the sample from which they were assembled and binned. For example, the name 'ULRT4\_3.bins.75' meant that this bin was generated from the metagenomic dataset of the sample ULRT4\_3 (representing the third replicate sample collected from the unamended layer of the reclaimed tailings at four years after ecological restoration initiation), as the 75th bin of the genome bins recovered from the mine wasteland.

**Supplementary Table 2. Directions of dissimilatory sulfur metabolism for the MAGs recovered in this study.**

| Putative functions                        | Genes                                                                                                                                     | MAG No. | MAGs                                                                                               |
|-------------------------------------------|-------------------------------------------------------------------------------------------------------------------------------------------|---------|----------------------------------------------------------------------------------------------------|
| Sulfate reduction (to sulfide)            | <i>aprBA</i> , <i>sat</i> are present, DsrAB cluster with reductive DsrAB, <i>dsrD</i> gene is present, and <i>dsrEFH</i> are absent      | 11      | Ac.bin1, Ac.bin2, Ac.bin3, Ac.bin4, Ac.bin5, Ac.bin6, Ac.bin7, Ac.bin11, De.bin1, De.bin2, De.bin3 |
| Sulfite reduction (to sulfide)            | DsrAB cluster with reductive DsrAB, <i>dsrD</i> gene is present, and <i>dsrEFH</i> are absent                                             | 2       | Ac.bin9, Ac.bin10                                                                                  |
| Sulfite reduction (to sulfide) incomplete | DsrAB cluster with reductive DsrAB, <i>dsrD</i> or <i>aprAB</i> , <i>sat</i> genes are not entirely present, and <i>dsrEFH</i> are absent | 3       | Ac.bin8, Ac.bin12, De.bin4                                                                         |

**Supplementary Table 3. Genes encoding glycoside hydrolases for the sulfate-reducing bacteria and reference species considered in this study.**

| Glycoside hydrolase family | Ac.bin1 | Ac.bin2 | Ac.bin3 | Ac.bin4 | Ac.bin5 | Ac.bin6 | <i>Terracidiphilus gabretensis</i> S55 | De.bin1 | <i>Desulfovibrio vulgaris</i> Hildenborough | <i>Desulfococcus multivorans</i> DSM 2059 |
|----------------------------|---------|---------|---------|---------|---------|---------|----------------------------------------|---------|---------------------------------------------|-------------------------------------------|
| GH3                        | 9       | 12      | 11      | 10      | 13      | 9       | 10                                     | 1       | 1                                           | 1                                         |
| GH13                       | 11      | 6       | 12      | 6       | 7       | 5       | 7                                      | 4       | 2                                           | 3                                         |
| GH23                       | 4       | 2       | 5       | 2       | 3       | 2       | 3                                      | 5       | 8                                           | 4                                         |
| GH2                        | 4       | 9       | 4       | 5       | 7       | 6       | 6                                      | 0       | 0                                           | 0                                         |
| GH31                       | 5       | 5       | 5       | 5       | 6       | 6       | 3                                      | 0       | 0                                           | 0                                         |
| GH29                       | 6       | 6       | 6       | 4       | 7       | 3       | 3                                      | 0       | 0                                           | 0                                         |
| GH28                       | 4       | 6       | 3       | 6       | 7       | 5       | 3                                      | 0       | 0                                           | 0                                         |
| GH27                       | 3       | 7       | 2       | 7       | 3       | 6       | 4                                      | 0       | 0                                           | 0                                         |
| GH92                       | 2       | 6       | 2       | 5       | 4       | 5       | 3                                      | 0       | 0                                           | 0                                         |
| GH35                       | 5       | 4       | 5       | 3       | 2       | 3       | 3                                      | 0       | 0                                           | 0                                         |
| GH78                       | 2       | 6       | 2       | 5       | 2       | 5       | 0                                      | 0       | 0                                           | 0                                         |
| GH39                       | 3       | 6       | 4       | 3       | 3       | 3       | 5                                      | 0       | 0                                           | 0                                         |
| GH51                       | 4       | 2       | 3       | 2       | 6       | 2       | 2                                      | 0       | 0                                           | 0                                         |
| GH20                       | 3       | 4       | 3       | 3       | 3       | 3       | 3                                      | 0       | 0                                           | 0                                         |
| GH38                       | 1       | 5       | 2       | 3       | 2       | 4       | 2                                      | 0       | 0                                           | 0                                         |
| GH105                      | 2       | 5       | 1       | 2       | 5       | 2       | 2                                      | 0       | 0                                           | 0                                         |
| GH18                       | 3       | 2       | 3       | 2       | 3       | 3       | 4                                      | 0       | 0                                           | 0                                         |
| GH42                       | 3       | 3       | 3       | 3       | 1       | 2       | 1                                      | 0       | 0                                           | 0                                         |
| GH5                        | 1       | 3       | 3       | 2       | 3       | 1       | 3                                      | 0       | 0                                           | 0                                         |
| GH36                       | 2       | 2       | 2       | 1       | 5       | 1       | 4                                      | 0       | 0                                           | 0                                         |
| GH15                       | 2       | 2       | 2       | 2       | 2       | 2       | 2                                      | 0       | 0                                           | 0                                         |
| GH144                      | 2       | 2       | 3       | 2       | 1       | 2       | 1                                      | 0       | 0                                           | 0                                         |
| GH106                      | 0       | 3       | 0       | 4       | 2       | 3       | 1                                      | 0       | 0                                           | 0                                         |
| GH79                       | 1       | 4       | 1       | 2       | 2       | 2       | 1                                      | 0       | 0                                           | 0                                         |
| GH57                       | 1       | 1       | 1       | 2       | 1       | 2       | 1                                      | 2       | 1                                           | 0                                         |
| GH146                      | 1       | 3       | 1       | 2       | 2       | 1       | 1                                      | 0       | 0                                           | 0                                         |
| GH54                       | 1       | 2       | 1       | 2       | 1       | 2       | 2                                      | 0       | 0                                           | 0                                         |
| GH8                        | 2       | 0       | 2       | 1       | 1       | 1       | 2                                      | 1       | 0                                           | 0                                         |
| GH33                       | 0       | 3       | 0       | 2       | 2       | 1       | 0                                      | 0       | 0                                           | 0                                         |
| GH1                        | 1       | 1       | 2       | 1       | 1       | 1       | 1                                      | 0       | 0                                           | 0                                         |
| GH125                      | 1       | 1       | 1       | 1       | 2       | 1       | 1                                      | 0       | 0                                           | 0                                         |
| GH9                        | 3       | 0       | 2       | 0       | 2       | 0       | 1                                      | 0       | 0                                           | 0                                         |
| GH77                       | 1       | 1       | 1       | 1       | 1       | 0       | 1                                      | 0       | 1                                           | 0                                         |
| GH43                       | 1       | 3       | 1       | 0       | 0       | 1       | 5                                      | 0       | 0                                           | 0                                         |
| GH116                      | 0       | 2       | 0       | 3       | 0       | 1       | 3                                      | 0       | 0                                           | 0                                         |
| GH130                      | 1       | 1       | 1       | 1       | 1       | 0       | 1                                      | 0       | 0                                           | 0                                         |
| GH95                       | 1       | 2       | 0       | 1       | 0       | 1       | 2                                      | 0       | 0                                           | 0                                         |
| GH32                       | 1       | 0       | 1       | 1       | 1       | 1       | 2                                      | 0       | 0                                           | 0                                         |
| GH74                       | 2       | 0       | 2       | 0       | 1       | 0       | 0                                      | 0       | 0                                           | 0                                         |
| GH55                       | 1       | 1       | 1       | 0       | 1       | 0       | 2                                      | 0       | 0                                           | 0                                         |
| GH37                       | 1       | 1       | 1       | 0       | 1       | 0       | 0                                      | 0       | 0                                           | 0                                         |
| GH24                       | 0       | 1       | 0       | 1       | 0       | 1       | 1                                      | 0       | 0                                           | 1                                         |
| GH76                       | 0       | 2       | 0       | 1       | 0       | 1       | 2                                      | 0       | 0                                           | 0                                         |
| GH16                       | 0       | 0       | 1       | 2       | 1       | 0       | 0                                      | 0       | 0                                           | 0                                         |
| GH103                      | 0       | 0       | 0       | 0       | 0       | 0       | 0                                      | 2       | 1                                           | 1                                         |
| GH59                       | 0       | 1       | 0       | 1       | 1       | 1       | 0                                      | 0       | 0                                           | 0                                         |
| GH97                       | 1       | 1       | 1       | 0       | 0       | 0       | 1                                      | 0       | 0                                           | 0                                         |
| GH115                      | 0       | 1       | 1       | 0       | 1       | 0       | 1                                      | 0       | 0                                           | 0                                         |
| GH67                       | 1       | 0       | 1       | 0       | 1       | 0       | 0                                      | 0       | 0                                           | 0                                         |

|       |   |   |   |   |   |   |   |   |   |   |   |
|-------|---|---|---|---|---|---|---|---|---|---|---|
| GH141 | 1 | 0 | 0 | 1 | 0 | 1 | 0 | 0 | 0 | 0 | 0 |
| GH154 | 0 | 2 | 0 | 0 | 1 | 0 | 0 | 0 | 0 | 0 | 0 |
| GH137 | 0 | 1 | 0 | 1 | 0 | 1 | 0 | 0 | 0 | 0 | 0 |
| GH138 | 0 | 1 | 0 | 1 | 0 | 1 | 0 | 0 | 0 | 0 | 0 |
| GH10  | 0 | 1 | 0 | 0 | 1 | 0 | 1 | 0 | 0 | 0 | 0 |
| GH89  | 0 | 0 | 0 | 1 | 0 | 1 | 1 | 0 | 0 | 0 | 0 |
| GH102 | 0 | 0 | 0 | 0 | 0 | 0 | 0 | 0 | 0 | 1 | 1 |
| GH63  | 1 | 0 | 0 | 0 | 1 | 0 | 0 | 0 | 0 | 0 | 0 |
| GH44  | 1 | 0 | 1 | 0 | 0 | 0 | 1 | 0 | 0 | 0 | 0 |
| GH85  | 0 | 0 | 0 | 1 | 0 | 1 | 0 | 0 | 0 | 0 | 0 |
| GH94  | 0 | 0 | 0 | 0 | 1 | 0 | 1 | 0 | 0 | 0 | 0 |
| GH140 | 0 | 0 | 0 | 0 | 1 | 0 | 0 | 0 | 0 | 0 | 0 |
| GH26  | 1 | 0 | 0 | 0 | 0 | 0 | 0 | 0 | 0 | 0 | 0 |
| GH136 | 0 | 1 | 0 | 0 | 0 | 0 | 0 | 0 | 0 | 0 | 0 |
| GH120 | 0 | 1 | 0 | 0 | 0 | 0 | 0 | 0 | 0 | 0 | 0 |
| GH127 | 0 | 0 | 0 | 0 | 1 | 0 | 0 | 0 | 0 | 0 | 0 |
| GH93  | 0 | 1 | 0 | 0 | 0 | 0 | 0 | 0 | 0 | 0 | 0 |
| GH142 | 0 | 1 | 0 | 0 | 0 | 0 | 1 | 0 | 0 | 0 | 0 |
| GH139 | 0 | 0 | 0 | 0 | 1 | 0 | 0 | 0 | 0 | 0 | 0 |
| GH4   | 0 | 0 | 0 | 0 | 1 | 0 | 0 | 0 | 0 | 0 | 0 |
| GH50  | 0 | 0 | 0 | 0 | 0 | 0 | 0 | 0 | 1 | 0 | 0 |
| GH11  | 1 | 0 | 0 | 0 | 0 | 0 | 0 | 0 | 0 | 0 | 0 |

---

**Supplementary Table 4. Genes encoding hydrogenases for the sulfate-reducing bacteria and reference species considered in this study.**

| Hydrogenases  | Ac.bin1 | Ac.bin2 | Ac.bin3 | Ac.bin4 | Ac.bin5 | Ac.bin6 | <i>Terracidiphilus gabretensis</i> S55 | De.bin1 | <i>Desulfovibrio vulgaris</i> Hildenborough | <i>Desulfococcus multivorans</i> DSM 2059 |
|---------------|---------|---------|---------|---------|---------|---------|----------------------------------------|---------|---------------------------------------------|-------------------------------------------|
| FeFe Group A1 | 0       | 0       | 0       | 0       | 0       | 0       | 0                                      | 0       | 1                                           | 0                                         |
| FeFe Group A2 | 0       | 0       | 0       | 0       | 0       | 0       | 0                                      | 0       | 1                                           | 0                                         |
| NiFe Group 1a | 0       | 0       | 0       | 0       | 0       | 0       | 0                                      | 0       | 2                                           | 0                                         |
| NiFe Group 1b | 0       | 0       | 0       | 0       | 0       | 0       | 0                                      | 1       | 1                                           | 0                                         |
| NiFe Group 1d | 1       | 0       | 1       | 0       | 1       | 0       | 0                                      | 0       | 0                                           | 0                                         |
| NiFe Group 3d | 1       | 1       | 1       | 0       | 1       | 0       | 0                                      | 0       | 0                                           | 1                                         |
| NiFe Group 4c | 0       | 0       | 0       | 0       | 0       | 0       | 0                                      | 1       | 1                                           | 0                                         |
| NiFe Group 4e | 0       | 0       | 0       | 0       | 0       | 0       | 0                                      | 1       | 1                                           | 0                                         |

Supplementary Table 5. Genes encoding respiratory complex for the sulfate-reducing bacteria and reference species considered in this study.

| COG     | Gene             | Function                                                          | Ac.bin1 | Ac.bin2 | Ac.bin3 | Ac.bin4 | Ac.bin5 | Ac.bin6 | <i>Terracidiphilus gabretensis</i> S55 | De.bin1 | <i>Desulfovibrio vulgaris</i> Hildenborough | <i>Desulfococcus multivorans</i> DSM 2059 |
|---------|------------------|-------------------------------------------------------------------|---------|---------|---------|---------|---------|---------|----------------------------------------|---------|---------------------------------------------|-------------------------------------------|
| COG0838 | <i>nuoA</i>      | respiratory complex I (NADH dehydrogenase 1)                      | 2       | 2       | 3       | 2       | 2       | 2       | 2                                      | 2       | 0                                           | 1                                         |
| COG0852 | <i>nuoC</i>      | respiratory complex I (NADH dehydrogenase 1)                      | 2       | 2       | 2       | 2       | 2       | 2       | 2                                      | 3       | 2                                           | 1                                         |
| COG0649 | <i>nuoD</i>      | respiratory complex I (NADH dehydrogenase 1)                      | 2       | 2       | 3       | 2       | 2       | 2       | 2                                      | 2       | 0                                           | 0                                         |
| COG1005 | <i>nuoH</i>      | respiratory complex I (NADH dehydrogenase 1)                      | 2       | 2       | 3       | 2       | 2       | 2       | 2                                      | 2       | 0                                           | 1                                         |
| COG0839 | <i>nuoJ</i>      | respiratory complex I (NADH dehydrogenase 1)                      | 2       | 2       | 3       | 2       | 2       | 2       | 2                                      | 2       | 0                                           | 1                                         |
| COG0713 | <i>nuoK</i>      | respiratory complex I (NADH dehydrogenase 1)                      | 2       | 2       | 3       | 2       | 2       | 2       | 2                                      | 2       | 0                                           | 1                                         |
| COG1009 | <i>nuoL</i>      | respiratory complex I (NADH dehydrogenase 1)                      | 2       | 2       | 4       | 3       | 2       | 3       | 2                                      | 2       | 1                                           | 2                                         |
| COG1008 | <i>nuoM</i>      | respiratory complex I (NADH dehydrogenase 1)                      | 3       | 3       | 4       | 3       | 3       | 3       | 3                                      | 3       | 0                                           | 1                                         |
| COG1007 | <i>nuoN</i>      | respiratory complex I (NADH dehydrogenase 1)                      | 2       | 2       | 3       | 2       | 2       | 2       | 2                                      | 2       | 0                                           | 1                                         |
| COG1905 | <i>nuoE</i>      | respiratory complex I (NADH dehydrogenase 1)                      | 2       | 3       | 3       | 1       | 2       | 1       | 1                                      | 1       | 0                                           | 4                                         |
| COG1894 | <i>nuoF</i>      | respiratory complex I (NADH dehydrogenase 1)                      | 2       | 3       | 3       | 1       | 3       | 1       | 1                                      | 1       | 0                                           | 4                                         |
| COG3383 | <i>nuoG</i>      | respiratory complex I (NADH dehydrogenase 1)                      | 4       | 4       | 6       | 5       | 5       | 5       | 1                                      | 3       | 0                                           | 7                                         |
| COG0377 | <i>nuoB</i>      | respiratory complex I (NADH dehydrogenase 1)                      | 2       | 2       | 3       | 2       | 1       | 2       | 2                                      | 1       | 0                                           | 0                                         |
| COG1143 | <i>nuoI</i>      | respiratory complex I (NADH dehydrogenase 1)                      | 3       | 4       | 4       | 3       | 4       | 3       | 2                                      | 5       | 6                                           | 1                                         |
| COG1034 | <i>nuoG_a</i>    | respiratory complex I (NADH dehydrogenase 1)                      | 0       | 0       | 1       | 0       | 0       | 0       | 0                                      | 1       | 0                                           | 1                                         |
| COG1252 | <i>ndh</i>       | respiratory complex I (NADH dehydrogenase 2)                      | 1       | 1       | 1       | 0       | 1       | 0       | 1                                      | 1       | 2                                           | 1                                         |
| COG0029 | <i>sdhA/frdA</i> | respiratory complex II (succinate dehydrogenase)                  | 1       | 1       | 1       | 1       | 1       | 1       | 1                                      | 1       | 1                                           | 1                                         |
| COG0479 | <i>sdhB/frdB</i> | respiratory complex II (succinate dehydrogenase)                  | 1       | 1       | 3       | 1       | 1       | 1       | 1                                      | 2       | 2                                           | 1                                         |
| COG2009 | <i>sdhC</i>      | respiratory complex II (succinate dehydrogenase)                  | 1       | 1       | 1       | 0       | 0       | 0       | 1                                      | 0       | 0                                           | 0                                         |
| COG1053 | <i>sdhA</i>      | respiratory complex II (succinate dehydrogenase)                  | 2       | 3       | 2       | 1       | 2       | 1       | 1                                      | 3       | 4                                           | 2                                         |
| COG0723 | <i>petC</i>      | respiratory complex III (quinol-cytochrome-c reductase)           | 6       | 5       | 7       | 2       | 5       | 2       | 1                                      | 0       | 0                                           | 1                                         |
| COG1290 | <i>petB/petD</i> | respiratory complex III (quinol-cytochrome-c reductase)           | 5       | 4       | 6       | 2       | 6       | 2       | 1                                      | 0       | 0                                           | 0                                         |
| COG0243 | <i>actB1</i>     | respiratory complex III (quinol-cytochrome-c reductase)           | 2       | 2       | 3       | 2       | 3       | 2       | 1                                      | 6       | 9                                           | 5                                         |
| COG0437 | <i>actB</i>      | respiratory complex III (quinol-cytochrome-c reductase)           | 4       | 3       | 12      | 3       | 4       | 4       | 0                                      | 3       | 10                                          | 7                                         |
| COG5557 | <i>actC</i>      | respiratory complex III (quinol-cytochrome-c reductase)           | 2       | 2       | 2       | 2       | 2       | 2       | 1                                      | 2       | 3                                           | 5                                         |
| COG1622 | <i>coxM</i>      | respiratory complex IV (low-affinity terminal oxidase)            | 0       | 0       | 0       | 0       | 2       | 0       | 1                                      | 1       | 0                                           | 0                                         |
| COG0843 | <i>coxN</i>      | respiratory complex IV (low-affinity terminal oxidase)            | 3       | 2       | 4       | 2       | 3       | 1       | 2                                      | 1       | 1                                           | 0                                         |
| COG1845 | <i>coxO</i>      | respiratory complex IV (low-affinity terminal oxidase)            | 4       | 3       | 4       | 3       | 3       | 3       | 3                                      | 1       | 1                                           | 0                                         |
| COG3125 | <i>ctaF</i>      | respiratory complex IV (low-affinity terminal oxidase)            | 0       | 0       | 0       | 0       | 0       | 0       | 0                                      | 1       | 0                                           | 0                                         |
| COG1271 | <i>cydA</i>      | respiratory complex IV (bd-type high-affinity terminal oxidase)   | 2       | 2       | 3       | 2       | 3       | 2       | 0                                      | 2       | 3                                           | 4                                         |
| COG1294 | <i>cydB</i>      | respiratory complex IV (bd-type high-affinity terminal oxidase)   | 1       | 1       | 2       | 1       | 2       | 1       | 0                                      | 1       | 1                                           | 2                                         |
| COG3278 | <i>ccoN</i>      | respiratory complex IV (cbb3-type high-affinity terminal oxidase) | 0       | 1       | 1       | 1       | 0       | 1       | 0                                      | 0       | 0                                           | 1                                         |
| COG2993 | <i>ccoO</i>      | respiratory complex IV (cbb3-type high-affinity terminal oxidase) | 0       | 0       | 1       | 0       | 0       | 0       | 0                                      | 0       | 0                                           | 0                                         |
| COG0056 | <i>atpA</i>      | respiratory complex V (F-type ATP synthase)                       | 1       | 2       | 1       | 1       | 1       | 1       | 1                                      | 1       | 1                                           | 2                                         |
| COG0055 | <i>atpD</i>      | respiratory complex V (F-type ATP synthase)                       | 1       | 2       | 1       | 1       | 1       | 1       | 1                                      | 1       | 1                                           | 2                                         |
| COG0712 | <i>atpH</i>      | respiratory complex V (F-type ATP synthase)                       | 1       | 2       | 1       | 1       | 1       | 1       | 1                                      | 1       | 1                                           | 1                                         |
| COG0355 | <i>atpC</i>      | respiratory complex V (F-type ATP synthase)                       | 1       | 2       | 1       | 1       | 1       | 1       | 1                                      | 1       | 1                                           | 2                                         |
| COG0224 | <i>atpG</i>      | respiratory complex V (F-type ATP synthase)                       | 1       | 2       | 1       | 1       | 1       | 1       | 1                                      | 1       | 2                                           | 2                                         |
| COG0356 | <i>atpB</i>      | respiratory complex V (F-type ATP synthase)                       | 1       | 2       | 1       | 1       | 1       | 1       | 1                                      | 1       | 1                                           | 3                                         |
| COG0711 | <i>atpF</i>      | respiratory complex V (F-type ATP synthase)                       | 1       | 2       | 1       | 2       | 2       | 2       | 2                                      | 2       | 2                                           | 5                                         |

Supplementary Table 6. Core genes responsible for chemotaxis and motility for the sulfate-reducing bacteria and reference species considered in this study.

| KO      | Gene              | Function                                                                    | Ac.bin1 | Ac.bin2 | Ac.bin3 | Ac.bin4 | Ac.bin5 | Ac.bin6 | <i>Terracidiphilus gabretensis</i> S55 | De.bin1 | <i>Desulfovibrio vulgaris</i> Hildenborough | <i>Desulfococcus multivorans</i> DSM 2059 |
|---------|-------------------|-----------------------------------------------------------------------------|---------|---------|---------|---------|---------|---------|----------------------------------------|---------|---------------------------------------------|-------------------------------------------|
| PF00015 | <i>MCP</i>        | methyl-accepting chemotaxis protein                                         | 2       | 1       | 0       | 1       | 6       | 1       | 1                                      | 34      | 28                                          | 0                                         |
| K03412  | <i>cheB</i>       | protein-glutamate methyltransferase/glutaminase                             | 2       | 1       | 1       | 1       | 5       | 1       | 1                                      | 5       | 2                                           | 0                                         |
| K00575  | <i>cheR</i>       | chemotaxis protein methyltransferase CheR                                   | 1       | 1       | 0       | 1       | 5       | 1       | 1                                      | 4       | 2                                           | 0                                         |
| K13924  | <i>cheBR</i>      | wo-component system, chemotaxis family, CheB/CheR fusion protei             | 1       | 0       | 2       | 0       | 2       | 0       | 0                                      | 2       | 1                                           | 1                                         |
| K03407  | <i>cheA</i>       | two-component system, chemotaxis family, sensor kinase CheA                 | 2       | 1       | 0       | 1       | 4       | 1       | 1                                      | 4       | 3                                           | 0                                         |
| K03408  | <i>cheW</i>       | purine-binding chemotaxis protein CheW                                      | 1       | 1       | 0       | 1       | 4       | 1       | 1                                      | 4       | 4                                           | 0                                         |
| K03413  | <i>cheY</i>       | wo-component system, chemotaxis family, chemotaxis protein Che <sup>Y</sup> | 2       | 1       | 1       | 3       | 6       | 3       | 2                                      | 9       | 5                                           | 0                                         |
| K02387  | <i>flgB</i>       | flagellar basal-body rod protein FlgB                                       | 1       | 1       | 1       | 0       | 2       | 1       | 1                                      | 1       | 1                                           | 0                                         |
| K02388  | <i>flgC</i>       | flagellar basal-body rod protein FlgC                                       | 1       | 1       | 1       | 0       | 2       | 0       | 1                                      | 1       | 2                                           | 0                                         |
| K02389  | <i>flgD</i>       | flagellar basal-body rod modification protein FlgD                          | 1       | 1       | 1       | 0       | 1       | 0       | 1                                      | 2       | 1                                           | 0                                         |
| K02390  | <i>flgE</i>       | flagellar hook protein FlgE                                                 | 1       | 1       | 1       | 0       | 2       | 1       | 1                                      | 2       | 2                                           | 0                                         |
| K02391  | <i>flgF</i>       | flagellar basal-body rod protein FlgF                                       | 0       | 0       | 0       | 0       | 1       | 0       | 0                                      | 0       | 0                                           | 0                                         |
| K02392  | <i>flgG</i>       | flagellar basal-body rod protein FlgG                                       | 1       | 1       | 1       | 0       | 2       | 0       | 1                                      | 2       | 2                                           | 0                                         |
| K02396  | <i>flgK</i>       | flagellar hook-associated protein 1 FlgK                                    | 1       | 1       | 1       | 0       | 2       | 0       | 1                                      | 2       | 1                                           | 0                                         |
| K02397  | <i>flgL</i>       | flagellar hook-associated protein 3 FlgL                                    | 1       | 1       | 1       | 0       | 2       | 0       | 1                                      | 2       | 1                                           | 0                                         |
| K02400  | <i>flhA</i>       | flagellar biosynthesis protein FlhA                                         | 1       | 1       | 1       | 0       | 3       | 0       | 1                                      | 1       | 1                                           | 0                                         |
| K02401  | <i>flhB</i>       | flagellar biosynthetic protein FlhB                                         | 1       | 1       | 1       | 0       | 2       | 0       | 1                                      | 1       | 1                                           | 0                                         |
| K02406  | <i>flhC</i>       | flagellin                                                                   | 2       | 1       | 2       | 0       | 2       | 0       | 1                                      | 3       | 4                                           | 0                                         |
| K02407  | <i>flhD</i>       | flagellar hook-associated protein 2                                         | 1       | 1       | 1       | 0       | 2       | 0       | 1                                      | 2       | 1                                           | 0                                         |
| K02408  | <i>flhE</i>       | flagellar hook-basal body complex protein FlhE                              | 1       | 1       | 1       | 0       | 2       | 0       | 1                                      | 1       | 1                                           | 0                                         |
| K02409  | <i>flhF</i>       | flagellar M-ring protein FlhF                                               | 1       | 1       | 1       | 0       | 2       | 0       | 1                                      | 1       | 1                                           | 0                                         |
| K02410  | <i>flhG</i>       | flagellar motor switch protein FlhG                                         | 1       | 1       | 1       | 0       | 2       | 0       | 1                                      | 1       | 1                                           | 0                                         |
| K02411  | <i>flhH</i>       | flagellar assembly protein FlhH                                             | 1       | 2       | 1       | 0       | 2       | 0       | 1                                      | 1       | 1                                           | 0                                         |
| K02412  | <i>flhI</i>       | flagellum-specific ATP synthase                                             | 1       | 1       | 1       | 0       | 2       | 0       | 1                                      | 1       | 1                                           | 0                                         |
| K02416  | <i>flhM</i>       | flagellar motor switch protein FlhM                                         | 1       | 1       | 1       | 0       | 2       | 0       | 1                                      | 1       | 1                                           | 0                                         |
| K02417  | <i>flhN</i>       | flagellar motor switch protein FlhN                                         | 2       | 1       | 1       | 0       | 3       | 0       | 1                                      | 1       | 1                                           | 0                                         |
| K02419  | <i>flhP</i>       | flagellar biosynthetic protein FlhP                                         | 1       | 1       | 1       | 0       | 2       | 0       | 1                                      | 1       | 1                                           | 0                                         |
| K02420  | <i>flhQ</i>       | flagellar biosynthetic protein FlhQ                                         | 1       | 1       | 1       | 0       | 2       | 0       | 1                                      | 1       | 1                                           | 0                                         |
| K02421  | <i>flhR</i>       | flagellar biosynthetic protein FlhR                                         | 1       | 1       | 1       | 0       | 2       | 0       | 1                                      | 1       | 1                                           | 0                                         |
| K02556  | <i>motA</i>       | chemotaxis protein MotA                                                     | 2       | 2       | 2       | 2       | 4       | 1       | 2                                      | 5       | 4                                           | 0                                         |
| K02557  | <i>motB</i>       | chemotaxis protein MotB                                                     | 2       | 2       | 2       | 1       | 3       | 0       | 2                                      | 5       | 5                                           | 0                                         |
| K02650  | <i>pilA</i>       | type IV pilus assembly protein PilA                                         | 0       | 0       | 0       | 1       | 0       | 1       | 0                                      | 0       | 0                                           | 1                                         |
| K02652  | <i>pilB</i>       | type IV pilus assembly protein PilB                                         | 1       | 1       | 1       | 1       | 1       | 1       | 1                                      | 1       | 1                                           | 0                                         |
| K02653  | <i>pilC</i>       | type IV pilus assembly protein PilC                                         | 1       | 1       | 1       | 1       | 1       | 1       | 1                                      | 1       | 1                                           | 1                                         |
| K02654  | <i>pilD, pppA</i> | leader peptidase (prepilin peptidase) / N-methyltransferase                 | 1       | 1       | 1       | 2       | 1       | 2       | 1                                      | 1       | 2                                           | 1                                         |
| K02662  | <i>pilM</i>       | type IV pilus assembly protein PilM                                         | 1       | 1       | 1       | 1       | 1       | 1       | 1                                      | 0       | 0                                           | 1                                         |
| K02663  | <i>pilN</i>       | type IV pilus assembly protein PilN                                         | 1       | 1       | 1       | 1       | 0       | 1       | 1                                      | 0       | 0                                           | 0                                         |
| K02651  | <i>flp, pilA</i>  | pilus assembly protein Flp/PilA                                             | 1       | 1       | 1       | 0       | 5       | 0       | 0                                      | 0       | 2                                           | 1                                         |
| K02669  | <i>pilT</i>       | twitching motility protein PilT                                             | 0       | 0       | 0       | 1       | 1       | 1       | 0                                      | 3       | 1                                           | 2                                         |
| K02664  | <i>pilO</i>       | type IV pilus assembly protein PilO                                         | 0       | 0       | 0       | 0       | 0       | 0       | 0                                      | 0       | 0                                           | 1                                         |
| K02665  | <i>pilP</i>       | type IV pilus assembly protein PilP                                         | 0       | 0       | 0       | 0       | 0       | 0       | 0                                      | 0       | 0                                           | 1                                         |
| K02666  | <i>pilQ</i>       | type IV pilus assembly protein PilQ                                         | 0       | 0       | 0       | 0       | 0       | 0       | 0                                      | 1       | 1                                           | 1                                         |



**Supplementary Table 7. Classification\* of methyl-accepting chemotaxis proteins (MCP) for the sulfate-reducing bacteria and reference species considered in this study.**

|                                             | Ia        |            | Ib | II | III <sub>m</sub> | III <sub>c</sub> | IV <sub>a</sub> | IV <sub>b</sub> |
|---------------------------------------------|-----------|------------|----|----|------------------|------------------|-----------------|-----------------|
|                                             | Cluster I | Cluster II |    |    |                  |                  |                 |                 |
| Ac.bin1                                     | 0         | 0          | 0  | 0  | 0                | 0                | 1               | 1               |
| Ac.bin2                                     | 1         | 0          | 0  | 0  | 0                | 0                | 0               | 0               |
| Ac.bin3                                     | 0         | 0          | 0  | 0  | 0                | 0                | 0               | 0               |
| Ac.bin4                                     | 0         | 0          | 0  | 0  | 0                | 0                | 1               | 0               |
| Ac.bin5                                     | 2         | 0          | 0  | 0  | 0                | 0                | 1               | 3               |
| Ac.bin6                                     | 0         | 0          | 0  | 0  | 0                | 0                | 1               | 0               |
| <i>Terracidiphilus gabretensis</i> S55      | 1         | 0          | 0  | 0  | 0                | 0                | 0               | 0               |
| De.bin1                                     | 18        | 9          | 0  | 0  | 2                | 2                | 0               | 3               |
| <i>Desulfovibrio vulgaris</i> Hildenborough | 17        | 10         | 0  | 0  | 1                | 0                | 0               | 0               |
| <i>Desulfococcus multivorans</i> DSM 2059   | 0         | 0          | 0  | 0  | 0                | 0                | 0               | 0               |

\*Results are based on membrane topology and ligand-binding domain.

Supplementary Table 8. Genes encoding oxidative stress for the sulfate-reducing bacteria and reference species considered in this study.

| KO                      | Key proteins                                                               | Function                                           | Ac.bin1 | Ac.bin2 | Ac.bin3 | Ac.bin4 | Ac.bin5 | Ac.bin6 | <i>Terracidiphilus gabretensis</i> S55 | De.bin1 | <i>Desulfovibrio vulgaris</i> Hildenborough | <i>Desulfococcus multivorans</i> DSM 2059 |
|-------------------------|----------------------------------------------------------------------------|----------------------------------------------------|---------|---------|---------|---------|---------|---------|----------------------------------------|---------|---------------------------------------------|-------------------------------------------|
| K03781                  | catalase (EC 1.11.1.6)                                                     | hydrogen peroxide:hydrogen peroxide oxidoreductase | 0       | 0       | 0       | 0       | 2       | 0       | 0                                      | 1       | 1                                           | 1                                         |
| K00425                  | cytochrome bd oxygen reductase (EC 7.1.1.7)                                | Cytochrome bd oxygen reductase (cydA)              | 1       | 1       | 2       | 1       | 3       | 1       | 0                                      | 1       | 1                                           | 2                                         |
| K00426                  |                                                                            | Cytochrome bd oxygen reductase (cydB)              | 1       | 1       | 2       | 1       | 2       | 1       | 0                                      | 1       | 1                                           | 2                                         |
| K02274                  | cytochrome c oxidase (ferrocytochrome c:oxygen oxidoreductase, EC 7.1.1.9) | coxA, ctaD; cytochrome c oxidase subunit I         | 2       | 2       | 3       | 2       | 3       | 1       | 2                                      | 0       | 1                                           | 0                                         |
| K02275                  |                                                                            | coxB, ctaC; cytochrome c oxidase subunit II        | 3       | 2       | 3       | 2       | 6       | 1       | 3                                      | 0       | 1                                           | 0                                         |
| K02276                  |                                                                            | coxC, ctaE; cytochrome c oxidase subunit III       | 3       | 2       | 3       | 2       | 3       | 2       | 3                                      | 0       | 1                                           | 0                                         |
| K01738                  | cysteine synthase (CysK; EC 2.5.1.47)                                      | cysK; cysteine synthase                            | 2       | 1       | 2       | 2       | 3       | 1       | 1                                      | 1       | 1                                           | 1                                         |
| K00533                  | [Fe] hydrogenase (EC 1.12.7.2)                                             | ferredoxin hydrogenase large subunit               | 0       | 0       | 0       | 0       | 0       | 0       | 0                                      | 0       | 2                                           | 0                                         |
| K00534                  |                                                                            | ferredoxin hydrogenase small subunit               | 0       | 0       | 0       | 0       | 0       | 0       | 0                                      | 0       | 1                                           | 0                                         |
| K00428                  | cytochrome c peroxidase (Ccp; EC 1.11.1.5)                                 | cytochrome c peroxidase                            | 0       | 1       | 0       | 0       | 1       | 0       | 0                                      | 0       | 0                                           | 0                                         |
| COG1592;PF02915         | NADH peroxidases (EC 1.11.1.1)                                             | Rubrerythrin1;Nigerythrin                          | 3       | 1       | 3       | 0       | 2       | 0       | 1                                      | 5       | 5                                           | 7                                         |
| COG0491;PF00753         |                                                                            | Rubrerythrin2                                      | 2       | 2       | 2       | 2       | 5       | 2       | 5                                      | 2       | 2                                           | 3                                         |
| K00432                  | glutathione peroxidase (EC 1.11.1.9)                                       | gpx, btuE, bsaA; glutathione peroxidase            | 2       | 1       | 2       | 1       | 0       | 1       | 4                                      | 0       | 0                                           | 0                                         |
| K11065                  | thioredoxin peroxidase (Tpx; EC 1.11.1.15)                                 | tpx; thioredoxin-dependent peroxiredoxin           | 0       | 0       | 0       | 0       | 0       | 0       | 0                                      | 1       | 1                                           | 1                                         |
| K03564                  | thioredoxin-dependent peroxiredoxin (EC 1.11.1.24)                         | BCP                                                | 1       | 2       | 2       | 2       | 2       | 2       | 2                                      | 1       | 1                                           | 1                                         |
| PF00753;PF00258;COG0426 | rubredoxin-oxygen oxidoreductase                                           | rubredoxin-oxygen oxidoreductase (ROO)             | 1       | 0       | 0       | 0       | 0       | 0       | 0                                      | 2       | 1                                           | 4                                         |
| K05919                  | superoxide reductase (EC 1.15.1.2)                                         | dfx; superoxide reductase                          | 0       | 0       | 0       | 0       | 0       | 0       | 0                                      | 1       | 1                                           | 1                                         |
| K16627                  | superoxide dismutase (EC 1.15.1.1)                                         | Copper/zinc superoxide dismutase                   | 0       | 0       | 0       | 0       | 0       | 0       | 0                                      | 0       | 0                                           | 0                                         |
| K04565                  |                                                                            | Copper/zinc superoxide dismutase                   | 0       | 0       | 0       | 1       | 0       | 1       | 1                                      | 0       | 0                                           | 0                                         |
| K04564                  |                                                                            | Iron/manganese superoxide dismutase                | 1       | 1       | 1       | 1       | 1       | 1       | 1                                      | 1       | 1                                           | 2                                         |
| K00518                  | Nickel-containing superoxide dismutase                                     | 0                                                  | 0       | 0       | 0       | 0       | 0       | 0       | 0                                      | 0       | 0                                           | 1                                         |

**Supplementary Table 9. Virus-host linkages information for the sulfate-reducing bacteria and reference species considered in this study.**

| Viral sequence ID <sup>#</sup> | VirSorter_category | vContact2_cluster | No. of sequences in the cluster | Taxonomy                 | Virion-associated gene (i.e., capsid, terminase or portal) detected in viral sequences | Phage transposase & integrase detected in viral sequences | Phage tail component in viral sequences | Host genome bin                             | Host taxonomy (based on GTDB-Tk annotation)                                                                                      |
|--------------------------------|--------------------|-------------------|---------------------------------|--------------------------|----------------------------------------------------------------------------------------|-----------------------------------------------------------|-----------------------------------------|---------------------------------------------|----------------------------------------------------------------------------------------------------------------------------------|
| Ac.bin1.1                      | Category_5         | VC_335_0          | 5                               | unassigned               | +                                                                                      | -                                                         | -                                       | Ac.bin1                                     | Acidobacteriota;Acidobacteriae;Acidobacteriales;Acidobacteriaceae;Terracidiphilus;                                               |
| Ac.bin2.1                      | Category_5         | VC_335_0          | 5                               | unassigned               | +                                                                                      | -                                                         | -                                       | Ac.bin2                                     | Acidobacteriota;Acidobacteriae;Acidobacteriales;Acidobacteriaceae;Terracidiphilus;                                               |
| Ac.bin3.1                      | Category_5         | VC_335_0          | 5                               | unassigned               | +                                                                                      | -                                                         | -                                       | Ac.bin3                                     | Acidobacteriota;Acidobacteriae;Acidobacteriales;Acidobacteriaceae;Terracidiphilus;                                               |
| Ac.bin5.1                      | Category_5         | VC_335_0          | 5                               | unassigned               | +                                                                                      | -                                                         | -                                       | Ac.bin5                                     | Acidobacteriota;Acidobacteriae;Acidobacteriales;Acidobacteriaceae;                                                               |
| Ac.bin11.1                     | Category_5         | singleton         | -                               | unassigned               | +                                                                                      | -                                                         | -                                       | Ac.bin11                                    | Acidobacteriota;Acidobacteriae;Acidobacteriales;Acidobacteriaceae;Terracidiphilus;                                               |
| T. gabretensis.1               | Category_5         | VC_335_0          | 5                               | unassigned               | +                                                                                      | -                                                         | -                                       | <i>Terracidiphilus gabretensis</i> S55      | Acidobacteriota;Acidobacteriae;Acidobacteriales;Acidobacteriaceae;Terracidiphilus;                                               |
| D. vulgaris.1                  | Category_4         | singleton         | -                               | Caudovirales             | +                                                                                      | +                                                         | +                                       |                                             |                                                                                                                                  |
| D. vulgaris.2                  | Category_4         | singleton         | -                               | Caudovirales             | +                                                                                      | +                                                         | +                                       |                                             |                                                                                                                                  |
| D. vulgaris.3                  | Category_5         | VC_61_0           | 9                               | Caudovirales; Myoviridae | +                                                                                      | -                                                         | +                                       |                                             |                                                                                                                                  |
| D. vulgaris.4                  | Category_5         | VC_336_0          | 3                               | Caudovirales             | +                                                                                      | +                                                         | +                                       | <i>Desulfovibrio vulgaris</i> Hildenborough | Desulfobacterota; Desulfovibrionia; Desulfovibrionales; Desulfovibrionaceae; Nitratidesulfovibrio; Nitratidesulfovibrio vulgaris |
| D. vulgaris.5                  | Category_5         | singleton         | -                               | Caudovirales             | -                                                                                      | +                                                         | +                                       |                                             |                                                                                                                                  |
| D. vulgaris.6                  | Category_5         | VC_336_0          | 3                               | Caudovirales             | -                                                                                      | +                                                         | +                                       |                                             |                                                                                                                                  |
| D. vulgaris.7                  | Category_5         | VC_336_0          | 3                               | Caudovirales             | +                                                                                      | +                                                         | +                                       |                                             |                                                                                                                                  |
| D. multivorans.1               | Category_5         | singleton         | -                               | unassigned               | +                                                                                      | -                                                         | -                                       |                                             |                                                                                                                                  |
| D. multivorans.2               | Category_5         | singleton         | -                               | Caudovirales             | -                                                                                      | -                                                         | +                                       | <i>Desulfococcus multivorans</i> DSM 2059   | Desulfobacterota; Desulfobacteria; Desulfobacteriales; Desulfococcaceae; Desulfococcus; Desulfococcus multivorans                |
| D. multivorans.3               | Category_5         | singleton         | -                               | unassigned               | -                                                                                      | +                                                         | -                                       |                                             |                                                                                                                                  |

<sup>#</sup>Viral sequences were named according to their host. For example, Ac.bin1.1 represents the first viral sequence of Ac.bin1.

**Supplementary Table 10. Glycoside hydrolases (GHs) encoded by viruses infecting the sulfate-reducing bacteria and reference species considered in this study.**

| Viral sequence ID | Gene                                   | Host                                        | CAZy family | Signalp  | Phyre2 Annotation                                               | Protein Data Bank Best Hit ID | Model Confidence % | Sequence % Identity | Query Coverage (% of protein aligned) | Protein Phyre ID | Protein Model Organism        |
|-------------------|----------------------------------------|---------------------------------------------|-------------|----------|-----------------------------------------------------------------|-------------------------------|--------------------|---------------------|---------------------------------------|------------------|-------------------------------|
| Ac.bin3.1         | NODE_263_length_121426_cov_5.268051_26 | Ac.bin3                                     | GH105       | N        | D-4,5-unsaturated $\beta$ -glucuronyl hydrolase (EC: 3.2.1.172) | 4CE7                          | 100                | 42                  | 72                                    | 6219b7372294dff3 | <i>Nonlabens utvanivorans</i> |
| D. vulgaris.2     | NZ_CABHLV010000001.1_980               | <i>Desulfovibrio vulgaris</i> Hildenborough | GH23        | Y (1-32) | chitinase (EC 3.2.1.14)                                         | 3W6D                          | 100                | 18                  | 78                                    | cab4a76fdc34f6f0 | <i>Ralstonia</i> sp. A-471    |
| D. vulgaris.5     | NZ_CABHLV010000001.1_1306              | <i>Desulfovibrio vulgaris</i> Hildenborough | GH23        | Y (1-31) | chitinase (EC 3.2.1.14)                                         | 3W6D                          | 100                | 16                  | 79                                    | 99acf6a7696aa132 | <i>Ralstonia</i> sp. A-471    |

Supplementary Table 11. Viral methyl-accepting chemotaxis proteins (MCPs) and superoxide dismutase (SOD) encoded by viruses infecting the sulfate-reducing bacteria and reference species considered in this study.

| Virus            | Gene                      | Host                                        | size (aa) | MCP_Category    | Interpro Annotation | Function                                                    | start_aa | end_aa | Phyre2 Annotation                                                                                                   | Protein Data Bank Best Hit ID | Model Confidence % | Sequence % Identity | Query Coverage (% of protein aligned) | Protein Phyre ID | Protein Model Organism           |
|------------------|---------------------------|---------------------------------------------|-----------|-----------------|---------------------|-------------------------------------------------------------|----------|--------|---------------------------------------------------------------------------------------------------------------------|-------------------------------|--------------------|---------------------|---------------------------------------|------------------|----------------------------------|
| D. vulgaris.1    | NZ_CABHLV010000001.1_2702 |                                             | 813       | Ia (Cluster II) | PF17201             | Cache 3/Cache 2 fusion domain                               | 34       | 318    |                                                                                                                     |                               |                    |                     |                                       |                  |                                  |
|                  |                           |                                             |           |                 | PF00672             | HAMP domain                                                 | 341      | 390    | Cache domain of methyl-accepting chemotaxis protein                                                                 | 3CSC                          | 99.7               | 17                  | 34                                    | 97c8efb277d8aa81 | <i>Vibrio cholerae</i>           |
|                  |                           |                                             |           |                 | PF08448             | PAS fold                                                    | 405      | 513    |                                                                                                                     |                               |                    |                     |                                       |                  |                                  |
| D. vulgaris.1    | NZ_CABHLV010000001.1_2799 | <i>Desulfovibrio vulgaris</i> Hildenborough | 626       | Ia (Cluster I)  | PF00015             | Methyl-accepting chemotaxis protein (MCP) signalling domain | 590      | 773    |                                                                                                                     |                               |                    |                     |                                       |                  |                                  |
|                  |                           |                                             |           |                 | PF08269             | Cache domain 2                                              | 54       | 227    | Cache-like sensor domain mediating C2 (glycolate and acetate) and C3 (propionate and pyruvate) carboxylates sensing | 5G4Y                          | 99.5               | 43                  | 23                                    | 74ba713b5a5c3de9 | <i>Pseudomonas syringae</i>      |
|                  |                           |                                             |           |                 | PF00672             | HAMP domain                                                 | 251      | 301    |                                                                                                                     |                               |                    |                     |                                       |                  |                                  |
|                  |                           |                                             |           |                 | PF00015             | Methyl-accepting chemotaxis protein (MCP) signalling domain | 409      | 591    |                                                                                                                     |                               |                    |                     |                                       |                  |                                  |
| D. vulgaris.2    | NZ_CABHLV010000001.1_943  |                                             | 804       | Ia (Cluster II) | PF02743             | Double Cache domain 1                                       | 49       | 284    |                                                                                                                     |                               |                    |                     |                                       |                  |                                  |
|                  |                           |                                             |           |                 | PF00672             | HAMP domain                                                 | 338      | 384    | Double CACHE (dCACHE) domain mediating lactate sensing                                                              | 5WBF                          | 99.9               | 34                  | 11                                    | 6cee65165d56c32c | <i>Helicobacter pylori</i> 26695 |
|                  |                           |                                             |           |                 | PF13426             | PAS domain                                                  | 405      | 507    |                                                                                                                     |                               |                    |                     |                                       |                  |                                  |
| D. multivorans.2 | CP015381.1_2500           | <i>Desulfococcus multivorans</i> DSM 2059   | 157       | /               | PF00015             | Methyl-accepting chemotaxis protein (MCP) signalling domain | 587      | 768    |                                                                                                                     |                               |                    |                     |                                       |                  |                                  |
|                  |                           |                                             |           |                 | PF09055             | Nickel-containing superoxide dismutase                      | 27       | 150    | Nickel-containing superoxide dismutase, NiSOD                                                                       | 1T6U                          | 100                | 16                  | 75                                    | ee61aa0b878be49  | <i>Streptomyces coelicolor</i>   |

**Supplementary Table 12. Selected physico-chemical properties of soil samples used for metatranscriptomic analysis of this study.**

|                                                     | ULRT1 | ULRT2 | ULRT3 |
|-----------------------------------------------------|-------|-------|-------|
| pH                                                  | 7.65  | 7.80  | 7.75  |
| Eh (mV)                                             | 190   | 191   | 194   |
| Total C (mg g <sup>-1</sup> )                       | 5.18  | 1.90  | 2.71  |
| Total S (mg g <sup>-1</sup> )                       | 144   | 120   | 138   |
| SO <sub>4</sub> <sup>2-</sup> (mg g <sup>-1</sup> ) | 14.8  | 12.9  | 11.1  |
| S <sup>2-</sup> (μg g <sup>-1</sup> )               | 1.83  | 18.7  | 7.60  |
| Fe <sup>2+</sup> (μg g <sup>-1</sup> )              | 10.6  | 9.19  | 5.22  |

**Supplementary Table 13. Genes responsible for denitrification and fermentation illustrated in Supplementary Figure 10 in this study.**

| KO     | Function                       | Ac.bin5 | De.bin1 |
|--------|--------------------------------|---------|---------|
| K00370 | nitrate reductase 1            | 0       | 0       |
| K00371 | nitrate reductase 1            | 0       | 0       |
| K00374 | nitrate reductase 1            | 0       | 0       |
| K02567 | nitrate reductase (cytochrome) | 0       | 0       |
| K02568 | nitrate reductase (cytochrome) | 0       | 0       |
| K00368 | nitrate reductase (NO-forming) | 0       | 0       |
| K15864 | nitrate reductase (NO-forming) | 0       | 0       |
| K04561 | nitric oxide reductase         | 2       | 1       |
| K02305 | nitric oxide reductase         | 0       | 0       |
| K00376 | nitrous-oxide reductase        | 0       | 0       |

**Supplementary Table 14. The information of metatranscriptomic datasets used in this study.**

|                                                                                               | ULRT1    | ULRT2    | ULRT3    |
|-----------------------------------------------------------------------------------------------|----------|----------|----------|
| No. of metatranscriptomic raw reads                                                           | 42179613 | 89679037 | 47502326 |
| No. of metatranscriptomic quality-trimmed reads                                               | 40357389 | 86004585 | 43953294 |
| No. of quality-trimmed cDNA reads                                                             | 32042524 | 48888842 | 34021435 |
| No. of quality-trimmed cDNA reads that could be mapped to the 16 MAGs recovered in this study | 66601    | 136109   | 214175   |



93 **Supplementary References**

- 94 1. Müller, A. L., Kjeldsen, K. U., Rattei, T., Pester, M. & Loy, A. Phylogenetic and  
95 environmental diversity of DsrAB-type dissimilatory (bi)sulfite reductases. *ISME*  
96 *J.* **9**, 1152–1165 (2015).
- 97 2. Anantharaman, K. et al. Expanded diversity of microbial groups that shape the  
98 dissimilatory sulfur cycle. *ISME J.* **12**, 1715–1728 (2018).
- 99 3. Mizuno, N., Voordouw, G., Miki, K., Sarai, A. & Higuchi, Y. Crystal structure of  
100 dissimilatory sulfite reductase D (DsrD) protein–possible interaction with B- and  
101 Z-DNA by its winged-helix motif. *Structure.* **11**, 1133–1140 (2003).
- 102 4. Fu, R., Wall, J. D. & Voordouw G. DcrA, a c-Type Heme-containing  
103 methyl-accepting protein from *Desulfovibrio vulgaris* Hildenborough, senses the  
104 oxygen concentration or redox potential of the environment. *J. Bacteriol.* **176**,  
105 344–350 (1994).
- 106 5. Ray, J. et al. Exploring the role of CheA3 in *Desulfovibrio vulgaris*  
107 Hildenborough motility. *Front Microbiol.* **5**, 77 (2014).
